# Supplementary material
Source: ML conference proceedings conference paper supplement (https://proceedings.mlr.press/v70/sun17a.html)
Supplement: Supplementary file [file sun17a-supp.pdf]

## Appendix

### A. Proof of Proposition 2.1

*Proof.* The proof is mainly about adapting the specific two-player game presented in (Mannor et al., 2009) to the general online convex programming setting with adversarial constraints. We closely follow the notations in the example from Proposition 4 in (Mannor et al., 2009).

Let us define the decision set  $\mathcal{X} = \Delta([1, 2])$ , namely a 2-D simplex. We design two different loss functions:  $\ell^1(x) = [-1, 0]x$ , and  $\ell^2(x) = [-1, 1]x$  (here  $[a, b]$  stands for a 2-d row vector and hence  $[a, b]x$  stands for the regular vector inner product). We also design two different constraints as:  $f^1(x) = [-1, -1]x \leq 0$  and  $f^2(x) = [1, -1]x \leq 0$ . Note that both  $\ell$  and  $f$  are linear functions with respect  $x$ , hence they are convex loss functions and constraints with respect to  $x$ . The adversary picks loss functions among  $\{\ell^1, \ell^2\}$  and constraints among  $\{f^1, f^2\}$  and will generate the following sequence of loss functions and constraints. Initialize a counter  $k = 0$ , then:

1. while  $k = 0$  or  $\frac{1}{t-1} \sum_{i=1}^{t-1} x_i[1] > 3/4$ , the adversary set  $\ell_t = \ell^2(x)$  and  $f_t = f^2(x)$ , and set  $k := k + 1$ .
2. For next  $k$  steps, the adversary set  $\ell_t = \ell^1(x)$  and  $f_t = f^1(x)$ . Then reset  $k = 0$  and go back to step 1.

For any time step  $t$ , let us define  $\hat{q}_t = \frac{1}{t} \sum_{i=1}^t \mathbb{1}(f_i = f^2)$ , namely the fraction of the adversary picking the second type of constraint. Let us define  $\hat{\alpha}_t = \sum_{i=1}^t x_i[1]/t$ . Given any  $\hat{q}_t$ , we see that  $\mathcal{O}'$  can be defined as

$$\begin{aligned} \mathcal{O}' &= \{x \in \Delta([1, 2]) : \hat{q}_t[1, -1]x + (1 - \hat{q}_t)[-1, -1]x \leq 0\} \\ &= \{x \in \Delta([1, 2]) : [2\hat{q}_t - 1, -1]x \leq 0\} = \{x \in \Delta([1, 2]) : 2\hat{q}_t x[1] - 1 \leq 0\}, \end{aligned} \quad (17)$$

and the minimum loss the learner can get in hindsight with decisions restricted to  $\mathcal{O}'$  is:

$$\begin{aligned} r_t^{\min} &= \min_{x \in \mathcal{O}'} (1 - \hat{q}_t)[-1, 0]x + \hat{q}_t[-1, 1]x \\ &= \begin{cases} -1 & 0 \leq \hat{q}_t \leq 1/2 \\ -1/2 - 1/(2\hat{q}_t) + \hat{q}_t & 1/2 \leq \hat{q}_t \leq 1 \end{cases} \end{aligned} \quad (18)$$

The cumulative constraint violation at time step  $t$  can be computed as  $\sum_{i=1}^t f_i(x_i) = \sum_{i=1}^t \mathbb{1}(f_i = f^1)[-1, -1]x_i + \mathbb{1}(f_i = f^2)[1, -1]x_i$ . We want to show that no matter what strategy the learner uses, as long as  $\frac{1}{t} \limsup_{i \rightarrow \infty} \sum_i f_i(x_i) \leq 0$ , we will have  $\limsup_{t \rightarrow \infty} (\sum_{i=1}^t \ell_i(x_i)/t) - r_t^{\min} > 0$ .

Following a similar argument from (Mannor et al., 2009), we can show that Step 2 is entered an infinite number of times. To show this, assume that step 2 only enters finite number of times. Hence as the game keeps staying in Step 1, the fraction of the adversary picking the second constraint  $f^2$  approaches to one ( $\hat{q}_t \rightarrow 1$ ), we will have as  $t$  approaches to infinity,

$$\begin{aligned} \lim_{t \rightarrow \infty} \frac{1}{t} \sum_{i=1}^t f_i(x_i) &= \lim_{t \rightarrow \infty} \frac{1}{t} \sum_{i=1}^t \mathbb{1}(f_i = f^1)[-1, -1]x_i + \frac{1}{t} \sum_{i=1}^t \mathbb{1}(f_i = f^2)[1, -1]x_i \\ &= \lim_{t \rightarrow \infty} \frac{1}{t} \sum_{i=1}^t \mathbb{1}(f_i = f^2)[1, -1]x_i = \lim_{t \rightarrow \infty} \frac{1}{t} \sum_{i=1}^t [1, -1]x_i = \lim_{t \rightarrow \infty} [1, -1] \left( \frac{1}{t} \sum_{i=1}^t x_i \right). \end{aligned} \quad (19)$$

Since  $\sum_{i=1}^t x_i/t \in \Delta([1, 2])$ , we must have  $\hat{\alpha}_t = \sum_{i=1}^t x_i[1]/t \leq 1/2$  to ensure that the long-term constraint is satisfied:  $\lim_{t \rightarrow \infty} \frac{1}{t} \sum_{i=1}^t f_i(x_i) \leq 0$ . But when  $\hat{\alpha}_t \leq 1/2$ , the condition of entering Step 1 is violated and we must enter step 2. Hence step 2 is entered infinite number of times. In particular, there exist infinite sequences  $t_i$  and  $t'_i$  such that  $t_i < t'_i < t_{i+1}$ , and the adversary picks  $f^2, \ell^2$  in  $(t_i, t'_i]$  (Step 1) and the adversary picks  $f^1, \ell^1$  in  $(t'_i, t_{i+1}]$  (Step 2). Since step 1 and step 2 executes the same number of steps (i.e., using the counter  $k$ 's value), we must have  $\hat{q}_{t_i} = 1/2$  and  $r_{t_i}^{\min} = 1$ . Furthermore, we must have  $t'_i \geq t_{i+1}/2$ . Note that  $\hat{\alpha}_{t'_i} \leq 3/4$  since otherwise the adversary would be in step 1 at time  $t'_i + 1$ . Thus, during the first  $t_{i+1}$  steps, we must have:

$$\sum_{j=1}^{t_{i+1}} x_j[1] = \sum_{j=1}^{t'_i} x_j[1] + \sum_{j=t'_i+1}^{t_{i+1}} x_j[1] \leq \frac{3}{4}t'_i + (t_{i+1} - t'_i) = t_{i+1} - t'_i/4 \leq \frac{7}{8}t_{i+1}. \quad (20)$$

It is easy to verify that  $\frac{1}{t_{i+1}} \sum_{t=1}^{t_{i+1}} \ell_t(x_t) \geq -\frac{1}{t_{i+1}} \sum_{t=1}^{t_{i+1}} x_t[1] \geq -\frac{7}{8}$ . Hence, simply let  $i \rightarrow \infty$ , we have:

$$\limsup_{t \rightarrow \infty} \left( \frac{1}{t} \sum_{i=1}^t \ell_i(x_i) - r_t^{\min} \right) \geq -7/8 + 1 = 1/8. \quad (21)$$

Namely, we have shown that for cumulative regret, regardless what sequence of decisions  $x_1, \dots, x_t$  the learner has played, as long as it needs to satisfy  $\limsup_{t \rightarrow \infty} \frac{1}{t} \sum_{i=1}^t f_i(x_i) \leq 0$ , we must have:

$$\limsup_{t \rightarrow \infty} \left( \sum_{i=1}^t \ell_i(x_i) - \min_{x \in \mathcal{O}'} \sum_{i=1}^t \ell_i(x) \right) \geq t/8 = \Omega(t). \quad (22)$$

Hence we cannot guarantee to achieve no-regret when competing against the decisions in  $\mathcal{O}'$  while satisfying the long-term constraint. □

## B. Analysis of Alg. 1 and Proof Of Theorem 3.1

*Proof of Theorem 3.1.* Since the algorithm runs online mirror descent on the sequence of loss  $\{\mathcal{L}_t(x, \lambda_t)\}_t$  with respect to  $x$ , using the existing results of online mirror descent (Theorem 4.2 and Eq. 4.10 from (Bubeck, 2015)), we know that for the sequence of  $\{x_t\}_t$ :

$$\sum_{t=1}^T (\mathcal{L}_t(x_t, \lambda_t) - \mathcal{L}_t(x, \lambda_t)) \leq \frac{D_R(x, x_1)}{\mu} + \frac{\mu}{2\alpha} \sum_{t=1}^T \|\nabla_x \mathcal{L}_t(x_t, \lambda_t)\|_*^2. \quad (23)$$

Also, we know that the algorithm runs online gradient ascent on the sequence of loss  $\{\mathcal{L}_t(x_t, \lambda)\}_t$  with respect to  $\lambda$ , using the existing analysis of online gradient descent (Zinkevich, 2003), we have for the sequence of  $\lambda_t$ :

$$\sum_{t=1}^T \mathcal{L}_t(x_t, \lambda) - \sum_{t=1}^T \mathcal{L}_t(x_t, \lambda_t) \leq \frac{1}{\mu} \lambda^2 + \frac{\mu}{2} \sum_{t=1}^T \left( \frac{\partial \mathcal{L}_t(x_t, \lambda_t)}{\partial \lambda_t} \right)^2, \quad (24)$$

Note that for  $(\nabla_x \mathcal{L}_t(x_t, \lambda_t))^2 = (f_t(x_t) - \delta \mu \lambda_t)^2 \leq 2f_t^2(x_t) + 2\delta^2 \mu^2 \lambda_t^2 \leq 2D^2 + \delta^2 \mu^2 \lambda_t^2$ . Similarly for  $\|\nabla_x \mathcal{L}_t(x_t, \lambda_t)\|_*^2$ , we also have:

$$\|\nabla_x \mathcal{L}_t(x_t, \lambda_t)\|_*^2 \leq 2\|\nabla \ell_t(x_t)\|_*^2 + 2\|\lambda_t \nabla f_t(x_t)\|_*^2 \leq 2G^2(1 + \lambda_t^2), \quad (25)$$

where we first used triangle inequality for  $\|\nabla_x \mathcal{L}_t(x_t, \lambda_t)\|_*$  and then use the inequality of  $2ab \leq a^2 + b^2, \forall a, b \in \mathcal{R}^+$ . We also assume that the norm of the gradients are bounded as  $\max(\|\nabla \ell_t(x_t)\|_*, \|\nabla f_t(x_t)\|_*) \leq G \in \mathcal{R}^+$ . Now sum Inequality 23 and 24 from  $t = 1$  to  $T$ , we get:

$$\begin{aligned} & \sum_t \mathcal{L}_t(x_t, \lambda) - \mathcal{L}_t(x, \lambda_t) \\ & \leq \frac{2D_R(x, x_0) + \lambda^2}{2\mu} + \sum_t \mu(D^2 + \delta^2 \mu^2 \lambda_t^2) + \sum_t \frac{\mu G^2}{\alpha} (1 + \lambda_t^2) \\ & = \frac{2D_R(x, x_0) + \lambda^2}{2\mu} + T\mu(D^2 + \frac{G^2}{\alpha}) + \mu(\delta^2 \mu^2 + \frac{G^2}{\alpha}) \sum \lambda_t^2. \end{aligned} \quad (26)$$

Using the saddle-point convex and concave formation for  $\mathcal{L}_t$ , we have:

$$\begin{aligned} \sum_t \mathcal{L}_t(x_t, \lambda) - \mathcal{L}_t(x, \lambda_t) & = \sum_t (\ell_t(x_t) - \ell_t(x)) + \sum_t (\lambda f_t(x_t) - \lambda_t f_t(x)) + \frac{\delta \mu}{2} \sum \lambda_t^2 - \frac{\delta \mu T}{2} \lambda^2 \\ & \leq \frac{2B + \lambda^2}{2\mu} + T\mu(D^2 + \frac{G^2}{\alpha}) + \mu(\delta^2 \mu^2 + \frac{G^2}{\alpha}) \sum \lambda_t^2. \end{aligned} \quad (27)$$

Note that based on the setting of  $\delta$  and  $\mu$ , we can show that  $\delta \geq \delta^2 \mu^2 + G^2/\alpha$ . This is because  $\delta^2 \mu^2 + G^2/\alpha = \frac{4G^4 B}{\alpha^2 T(D^2 + G^2/\alpha)} + G^2/\alpha \leq \frac{4G^2 B}{T\alpha} + G^2/\alpha \leq 2G^2/\alpha$ , where we assume that  $T$  is large enough such that  $T \geq 4B$ .

Since we have  $\delta \geq \delta^2 \mu^2 + G^2/\alpha$ , we can remove the term  $\sum_t \lambda_t^2$  in the above inequality.

$$\sum_t (\ell_t(x_t) - \ell_t(x)) + \sum_t (\lambda f_t(x_t) - \lambda_t f_t(x)) - \left(\frac{\delta \mu T}{2} + \frac{1}{2\mu}\right) \lambda^2 \leq \frac{2B}{2\mu} + T\mu(D^2 + G^2/\alpha). \quad (28)$$

Now set  $x = x^*$ , and set  $\lambda = 0$ , since  $f_t(x^*) \leq 0$  for all  $t$ , we get:

$$\sum_t (\ell_t(x_t) - \ell_t(x^*)) \leq \frac{2B}{2\mu} + T\mu(D^2 + G^2/\alpha) \leq 2\sqrt{BT(D^2 + G^2/\alpha)}, \quad (29)$$

where we set  $\mu = \sqrt{B/(T(D^2 + G^2/\alpha))}$ .

To upper bound  $\sum_t f_t(x_t)$ , we first note that we can lower bound  $\sum_{t=1}^T (\ell_t(x_t) - \ell_t(x))$  as  $\sum_{t=1}^T (\ell_t(x_t) - \ell_t(x)) \geq -2FT$ . Now let us assume that  $\sum_t f_t(x_t) > 0$  (otherwise we are done). We set  $\lambda = (\sum_t f_t(x_t))/(\delta \mu T + 1/\mu)$ , we have:

$$\begin{aligned} \frac{(\sum_t f_t(x_t))^2}{2\delta \mu T + 1/\mu} &\leq \frac{2B}{2\mu} + T\mu(D^2 + G^2/\alpha) + \sum_t (\ell_t(x^*) - \ell_t(x_t)) \\ &\leq 2\sqrt{BT(D^2 + G^2/\alpha)} + 2FT \end{aligned} \quad (30)$$

Substitute  $\mu = \sqrt{B/(T(D^2 + G^2/\alpha))}$  into the above inequality, we have:

$$\begin{aligned} \left(\sum_{t=1}^T f_t(x_t)\right)^2 &\leq 2\sqrt{BT(D^2 + G^2/\alpha)}(2\delta \mu T + 1/\mu) + 2FT(2\delta \mu T + 1/\mu) \\ &\leq \frac{8G^2}{\alpha} BT + 2T(D^2 + \frac{D^2}{\alpha}) + 2T(D^2 + \frac{G^2}{\alpha}) + T^{3/2} \sqrt{8F^2 G^2/\alpha}. \end{aligned} \quad (31)$$

Take the square root on both sides of the above inequality and observe that  $T^{3/2} \sqrt{8F^2 G^2/\alpha}$  dominates the RHS of the above inequality, we prove the theorem.  $\square$

### C. Analysis of EXP4.R

In this section we provide the full proof of theorem 4.2.

*Proof of Theorem 4.2.* We first present several known facts. First we have that for  $w_t^T \hat{z}_t$ :

$$w_t^T \hat{z}_t = \mathbb{E}_{i \sim w_t} \hat{z}_t[i] = \mathbb{E}_{i \sim w_t} \pi_i(s_t)^T \hat{r}_t = \mathbb{E}_{i \sim w_t} \mathbb{E}_{j \sim \pi_i(s_t)} \hat{r}_t[j] = \mathbb{E}_{j \sim p_t} \hat{r}_t[j] = r_t[a_t] \leq 1. \quad (32)$$

For  $w_t^T \hat{y}_t$ , we have:

$$w_t^T \hat{y}_t = \mathbb{E}_{i \sim w_t} \hat{y}_t[i] = \mathbb{E}_{i \sim w_t} \pi_i(s_t)^T \hat{c}_t = \mathbb{E}_{j \sim p_t} \hat{c}_t[j] = c_t[a_t] \leq 1. \quad (33)$$

For  $\mathbb{E}_{a_t \sim p_t} (w_t^T \hat{z}_t - \beta)^2$ , we then have:

$$\mathbb{E}_{a_t \sim p_t} (w_t^T \hat{z}_t - \beta)^2 = \mathbb{E}_{a_t \sim p_t} (r_t[a_t] - \beta)^2 \leq \mathbb{E}_{a_t} 2r_t[a_t]^2 + 2\beta^2 \leq 4. \quad (34)$$

For  $\mathbb{E}_{a_t \sim p_t} \hat{y}_t$ , we have:

$$\mathbb{E}_{a_t \sim p_t} \hat{y}_t[j] = \pi_j(s_t)^T \mathbb{E}_{a_t \sim p_t} \hat{c}_t = \pi_j(s_t)^T c_t = y_t[j], \quad (35)$$

Note that here for analysis simplicity we consider asymptotic property of the algorithm and assume  $T$  is large enough and particularly larger than any constant. We don't necessarily have to assume  $T \geq 4B$  here because we can explicitly solve the inequality  $\delta \geq \delta^2 \mu^2 + G^2/\alpha$  to find the valid range of  $\delta$ , as (Mahdavi et al., 2012) did.

which gives us  $\mathbb{E}_{a_t \sim p_t} \hat{y}_t = y_t$ . Similarly we can easily verify that  $\mathbb{E}_{a_t \sim p_t} \hat{z}_t = z_t$ .

For  $\sum_{i=1}^{|\Pi|} w_t[i] \hat{y}_t[i]^2$ , we have:

$$\begin{aligned} \sum_{i=1}^{|\Pi|} w_t[i] \hat{y}_t[i]^2 &= \mathbb{E}_{i \sim w_t} \hat{y}_t[i]^2 = \mathbb{E}_{i \sim w_t} (\pi_j(s_t)^T \hat{c}_t)^2 = \mathbb{E}_{i \sim w_t} (\mathbb{E}_{j \sim \pi_i(s_t)} \hat{c}_t[j])^2 \\ &\leq \mathbb{E}_{i \sim w_t} \mathbb{E}_{j \sim \pi_i(s_t)} (\hat{c}_t[j])^2 = \mathbb{E}_{j \sim p_t} (\hat{c}_t[j])^2 = \frac{c_t[a_t]^2}{p_t[a_t]}. \end{aligned} \quad (36)$$

Hence, for  $\mathbb{E}_{a_t \sim p_t} \sum_{i=1}^{|\Pi|} w_t[i] \hat{y}_t[i]^2$  we have:

$$\mathbb{E}_{a_t \sim p_t} \sum_{i=1}^{|\Pi|} w_t[i] \hat{y}_t[i]^2 \leq \mathbb{E}_{a_t \sim p_t} \frac{c_t[a_t]^2}{p_t[a_t]} = \sum_{k=0}^K c_t[k]^2 \leq K. \quad (37)$$

Similarly, for  $\sum_{i=1}^{|\Pi|} w_t[i] \hat{z}_t[i]^2$ , we have:

$$\sum_{i=1}^{|\Pi|} w_t[i] \hat{z}_t[i]^2 = \mathbb{E}_{i \sim w_t} (\pi_i(s_t)^T \hat{r}_t)^2 \leq \mathbb{E}_{j \sim p_t} (\hat{r}_t[j])^2 = \frac{r_t[a_t]^2}{p_t[a_t]}, \quad (38)$$

and

$$\mathbb{E}_{a_t \sim p_t} \sum_{i=1}^{|\Pi|} w_t[i] \hat{z}_t[i]^2 \leq K. \quad (39)$$

Now we are going to take expectation with respect to the randomized decisions  $\{a_i\}$  on both sides of Inequality 11. Fix time step  $t$ , conditioned on  $a_1, \dots, a_{t-1}$ , we have:

$$\begin{aligned} &\mathbb{E}_{a_t} \left[ \mathcal{L}_t(w_t, \lambda) - \mathcal{L}_t(w, \lambda_t) \right] \\ &= \mathbb{E}_{a_t} \left[ c_t[a_t] + \lambda(r_t[a_t] - \beta) - \frac{\delta\mu}{2} \lambda^2 - \hat{y}_t^T w - \lambda_t(\hat{z}_t^T w - \beta) + \frac{\delta\mu}{2} \lambda_t^2 \right] \\ &= \mathbb{E}_{a_t} c_t[a_t] + \lambda(\mathbb{E}_{a_t} r_t[a_t] - \beta) - \frac{\delta\mu}{2} \lambda^2 - y_t^T w - \lambda_t(z_t^T w - \beta) + \frac{\delta\mu}{2} \lambda_t^2. \end{aligned}$$

(Used fact that  $\mathbb{E}_{a_t \sim p_t} \hat{y}_t = y_t$  and  $\mathbb{E}_{a_t \sim p_t} \hat{z}_t = z_t$ )

Take the expectation with respect to  $a_1, \dots, a_T$  on the LHS of Inequality 11, we have:

$$\begin{aligned} \mathbb{E}_{\{a_t\}_t} \sum_{t=1}^T \left[ \mathcal{L}_t(w_t, \lambda) - \mathcal{L}_t(w, \lambda_t) \right] &= \sum_{t=1}^T \mathbb{E}_{a_1, \dots, a_{t-1}} \mathbb{E}_{a_t | a_1, \dots, a_{t-1}} \left[ \mathcal{L}_t(w_t, \lambda) - \mathcal{L}_t(w, \lambda_t) \right] \\ &= \sum_{t=1}^T \left[ \mathbb{E} c_t[a_t] + \lambda(\mathbb{E} r_t[a_t] - \beta) - y_t^T w - \lambda_t(z_t^T w - \beta) + \frac{\delta\mu}{2} \lambda_t^2 \right] - \frac{\delta\mu T}{2} \lambda^2 \end{aligned} \quad (40)$$

Now take the expectation with respect to  $a_1, \dots, a_T$  on the RHS of Inequality 11 (we use  $\mathbb{E}_{a_t | a_{-t}}$  to represent the expectation over the distribution of  $a_t$  conditioned on  $a_1, \dots, a_{t-1}$ ), we have:

$$\begin{aligned} &\frac{\lambda^2}{\mu} + \frac{\ln(|\Pi|)}{\mu} + \mu \sum_{t=1}^T \left( \mathbb{E}_{a_t | a_{-t}} \left( \sum_{i=1}^{|\Pi|} w_t[i] \hat{y}_t[i]^2 + \lambda_t^2 w_t[i] \hat{z}_t[i]^2 \right) + \mathbb{E}_{a_t | a_{-t}} (w_t^T \hat{z}_t - \beta)^2 + \delta^2 \mu^2 \lambda_t^2 \right) \\ &\leq \frac{\lambda^2}{\mu} + \frac{\ln(|\Pi|)}{\mu} + \mu \sum_{t=1}^T \left( K + \lambda_t^2 K + 4 + \delta^2 \mu^2 \lambda_t^2 \right) \\ &\quad \text{(Used Eq. 37 and 39)} \\ &= \frac{\lambda^2}{\mu} + \frac{\ln(|\Pi|)}{\mu} + \mu T(K + 4) + \mu(K + \delta^2 \mu^2) \sum_{t=1}^T \lambda_t^2. \end{aligned} \quad (41)$$

Note that based on the setting of  $\delta$  and  $\mu$ , we can show that  $\delta \geq 2K + 2\delta^2\mu^2$ . This is because  $2K + 2\delta^2\mu^2 = 2K + 18K^2 \ln(|\Pi|)/(T(K+4)) \leq 2K + 18K \ln(|\Pi|)/T \leq 3K$ , where for simplicity we assume that  $T$  is large enough ( $T \geq 18 \ln(|\Pi|)$ ).

Chain Eq. 40 and 41 together and get rid of the terms that have  $\lambda_t$  (due to the fact that  $\delta \geq 2K + 2\delta^2\mu^2$ ) and rearrange terms, we get:

$$\begin{aligned} & \mathbb{E}\left(\sum_{t=1}^T c_t[a_t] - \sum_{t=1}^T y_t^T w\right) + \sum_{t=1}^T \left(\lambda(\mathbb{E}r_t[a_t] - \beta) - \lambda_t(z_t^T w - \beta)\right) - \left(\frac{\delta\mu T}{2} + \frac{1}{\mu}\right)\lambda^2 \\ & \leq \frac{\ln(|\Pi|)}{\mu} + \mu T(K+4). \end{aligned} \quad (42)$$

The above inequality holds for any  $w$ . Substitute  $w^*$  into Eq. 42, we get:

$$\begin{aligned} & \mathbb{E}\left(\sum_{t=1}^T c_t[a_t] - \sum_{t=1}^T y_t^T w^*\right) + \sum_{t=1}^T \lambda(\mathbb{E}r_t[a_t] - \beta) - \left(\frac{\delta\mu T}{2} + \frac{1}{\mu}\right)\lambda^2 \\ & \leq \frac{\ln(|\Pi|)}{\mu} + \mu T(K+4). \end{aligned}$$

Now let us set  $\lambda = 0$ , for regret, we get:

$$\begin{aligned} & \mathbb{E}\left(\sum_{t=1}^T c_t[a_t] - \sum_{t=1}^T y_t^T w^*\right) \leq \ln(|\Pi|)/\mu + \mu T(K+4) \\ & \leq 2\sqrt{\ln(|\Pi|)T(K+4)} = O(\sqrt{TK \ln(|\Pi|)}), \end{aligned} \quad (43)$$

where  $\mu = \sqrt{\ln(|\Pi|)/T(K+4)}$ .

For constraints  $\sum(\mathbb{E}r_t[a_t] - \beta)$ , let us assume that  $\sum \mathbb{E}(r_t[a_t] - \beta) > 0$  (otherwise we are done), and substitute  $\lambda = (\sum \mathbb{E}r_t[a_t] - \beta)/(\delta\mu T + 2/\mu)$  into inequality 43 (note that  $\lambda > 0$ ). Using the fact that  $\mathbb{E}(\sum_{t=1}^T c_t[a_t] - \sum_{t=1}^T y_t^T w^*) \geq -2T$ , we get:

$$\left(\sum_{t=1}^T (\mathbb{E}r_t[a_t] - \beta)\right)^2 \leq (2\delta\mu T + 4/\mu)(2T + 2\sqrt{\ln(|\Pi|)T(K+2+2\beta^2)}) \quad (44)$$

Substitute  $\mu = \sqrt{\ln(|\Pi|)/T(K+4)}$  and  $\delta = 3K$  back to the above equation, it is easy to verify that:

$$\left(\sum_{t=1}^T (\mathbb{E}r_t[a_t] - \beta)\right)^2 \leq 12K \sqrt{\frac{\ln(|\Pi|)}{K+4}} T^{3/2} + 12K \ln(|\Pi|)T + 8T^{3/2} \sqrt{\frac{K+4}{\ln(|\Pi|)}} + 8T(K+4). \quad (45)$$

Since we consider the asymptotic property when  $T \rightarrow \infty$ , we can see that the LHS of the above inequality is dominated by  $\sqrt{K \ln(|\Pi|)}T^{3/2}$ . Hence,

$$\left(\sum_{t=1}^T (\mathbb{E}r_t[a_t] - \beta)\right)^2 \leq O(\sqrt{K \ln(|\Pi|)}T^{3/2}). \quad (46)$$

Take the square root on both sides of the above inequality, we prove the theorem.  $\square$

## D. Algorithm and Analysis of EXP4.P.R

### D.1. Algorithm

We present the EXP4.P.R algorithm in Alg. 3.

---

**Algorithm 3** Exp4.P with Risk Constraints (EXP4.P.R)
 

---

- 1: **Input:** Policy Set  $\Pi$
- 2: Initialize  $w_1 = [1/N, \dots, 1/N]^T$  and  $\lambda_1 = 0$ .
- 3: **for**  $t = 1$  to  $T$  **do**
- 4:   Receive context  $s_t$ .
- 5:   Query each experts to get the sequence of advice  $\{\pi_i(s_t)\}_{i=1}^N$ .
- 6:   Set  $p_t = \sum_{i=1}^N w_t[i] \pi_i(s_t)$ .
- 7:   Draw action  $a_t$  randomly according to probability  $p_t$ .
- 8:   Receive cost  $c_t[a_t]$  and risk  $r_t[a_t]$ .
- 9:   Set the cost vector  $\hat{c}_t \in R^K$  and the risk vector  $\hat{r}_t \in R^K$  as:

$$\hat{c}_t[i] = \frac{c_t[i] \mathbb{1}(a_t = i)}{p_t[i]}, \quad \hat{r}_t[i] = \frac{r_t[i] \mathbb{1}(a_t = i)}{p_t[i]}, \quad \forall i \in \{1, 2, \dots, K\}. \quad (47)$$

- 10:   For each expert  $j$ , set:

$$\hat{y}_t[j] = \pi_j(s_t)^T \hat{c}_t, \quad \hat{z}_t[j] = \pi_j(s_t)^T \hat{r}_t, \quad \forall j \in \{1, 2, \dots, N\}. \quad (48)$$

- 11:   Set  $\tilde{x}_t = \hat{y}_t + \lambda_t \hat{z}_t$ .
- 12:   Update  $w_{t+1}$  as:

$$w_{t+1}[i] = \frac{w_t[i] \exp(-\mu(\tilde{x}_t[i] - \kappa \sum_{k=1}^K \frac{\pi_i(s_t)[k]}{p_t[k]}))}{\sum_{j=1}^{|\Pi|} w_t[j] \exp(-\mu(\tilde{x}_t[j] - \kappa \sum_{k=1}^K \frac{\pi_j(s_t)[k]}{p_t[k]}))},$$

- 13:   Update  $\lambda_{t+1}$  as:

$$\lambda_{t+1} = \max\{0, \lambda_t + \mu(w_t^T \hat{z}_t - \beta - \delta \mu \lambda_t)\}.$$

- 14: **end for**
-

## D.2. Analysis of EXP4.P.R

We give detailed regret analysis of EXP4.P.R in this section. Let us define  $\hat{x}_t(\lambda)$  as  $\hat{x}_t(\lambda)[i] = \hat{y}_t[i] + \lambda \hat{z}_t[i] - \kappa \sum_{k=1}^K \frac{\pi_i(s_t)[k]}{p_t[k]}$ ,  $\forall i \in [N]$  and  $\mathcal{L}_t(w, \lambda) = w^T \hat{x}_t - \lambda \beta - \frac{\delta \mu}{2} \lambda^2$ . As we can see that Line 3 is essentially running Weighted Majority algorithm on the sequence of functions  $\{\mathcal{L}_t(w, \lambda_t)\}_t$  while Line 3 is running Online Gradient Ascent on the sequence of functions  $\{\mathcal{L}_t(w_t, \lambda)\}_t$ . Applying the classic analysis of Weighted Majority and analysis of Online Gradient Descent, we can show that:

**Lemma D.1.** *The sequences  $\{w_t\}_t$  and  $\{\lambda_t\}_t$  generated from Lines 3 and 3 in EXP4.P.R has the following property:*

$$\begin{aligned} & \sum_{t=1}^T \mathcal{L}_t(w_t, \lambda) - \sum_{t=1}^T \mathcal{L}_t(w, \lambda_t) \\ & \leq \frac{\lambda^2}{\mu} + \frac{\ln(|\Pi|)}{\mu} + \frac{\mu}{2} \sum_{t=1}^T \left( \sum_{i=1}^{|\Pi|} w_t[i] (\hat{x}_t(\lambda_t)[i])^2 + 2(w_t^T \hat{z}_t - \beta)^2 + 2\delta^2 \mu^2 \lambda_t^2 \right). \end{aligned} \quad (49)$$

*Proof.* Using the classic analysis of Weighted Majority algorithm, we can get that for the sequence of loss  $\{\mathcal{L}_t(w, \lambda_t)\}_t$ :

$$\sum_{t=1}^T \mathcal{L}_t(w_t, \lambda_t) - \sum_{t=1}^T \mathcal{L}_t(w, \lambda_t) \leq \frac{\ln(|\Pi|)}{\mu} + \frac{1}{2} \mu \sum_{t=1}^T \sum_{i=1}^{|\Pi|} w_t[i] (\hat{x}_t(\lambda_t)[i])^2,$$

for any  $w \in \mathcal{B}$ . On the other hand, we know that we compute  $\lambda_t$  by running Online Gradient Descent on the loss functions  $\{\mathcal{L}_t(w_t, \lambda)\}_t$ . Applying the classic analysis of Online Gradient Descent, we can get:

$$\sum_{t=1}^T \mathcal{L}_t(w_t, \lambda) - \sum_{t=1}^T \mathcal{L}_t(w_t, \lambda_t) \leq \frac{1}{\mu} \lambda^2 + \frac{\mu}{2} \sum_{t=1}^T \left( \frac{\partial \mathcal{L}_t(w_t, \lambda_t)}{\partial \lambda_t} \right)^2,$$

for any  $\lambda \geq 0$ .

We know that  $\partial \mathcal{L}_t(w_t, \lambda) / \partial \lambda_t = w_t^T \hat{z}_t - \beta - \delta \mu \lambda_t$ . Substitute these gradient and derivatives back to the above two inequalities, and then sum the above two inequality together we get:

$$\begin{aligned} & \sum_{t=1}^T \mathcal{L}_t(w_t, \lambda) - \sum_{t=1}^T \mathcal{L}_t(w, \lambda_t) \\ & \leq \frac{\lambda^2}{\mu} + \frac{\ln(|\Pi|)}{\mu} + \frac{\mu}{2} \sum_{t=1}^T \left( \sum_{i=1}^{|\Pi|} w_t[i] (\hat{x}_t(\lambda_t)[i])^2 + (w_t^T \hat{z}_t - \beta - \delta \mu \lambda_t)^2 \right) \\ & \leq \frac{\lambda^2}{\mu} + \frac{\ln(|\Pi|)}{\mu} + \frac{\mu}{2} \sum_{t=1}^T \left( \sum_{i=1}^{|\Pi|} w_t[i] (x_t(\lambda_t)[i])^2 + 2(w_t^T \hat{z}_t - \beta)^2 + 2\delta^2 \mu^2 \lambda_t^2 \right), \end{aligned}$$

where in the last inequality we use the fact that  $(a + b)^2 \leq 2a^2 + 2b^2$ , for any  $a, b \in \mathbb{R}$ .  $\square$

We first show that the Lagrangian dual parameter  $\lambda_t$  can be upper bounded:

**Lemma D.2.** *Assume that  $\delta \leq 1/\mu^2$ . For any  $t \in [T]$ , we have  $\lambda_t \leq \frac{|\beta|}{\delta \mu}$ .*

*Proof.* Remember that the update rule for  $\lambda_t$  is defined as:

$$\lambda_{t+1} = \max\{0, \lambda_t + \mu(w_t^T \hat{z}_t - \beta - \delta \mu \lambda_t)\}. \quad (50)$$

We prove the lemma by induction. For  $t = 0$ , since we set  $\lambda_0 = 0$ , we have  $\lambda_0 \leq (|\beta|)/(\delta \mu)$ . Now let us consider time step  $t$  and assume that that  $\lambda_t \leq (|\beta|)/(\delta \mu)$  for  $\tau \leq t$ . Note that  $w_t^T \hat{z}_t = r_t[a_t] \leq 0$  and from the update rule of  $\lambda$ , we have:

$$\lambda_{t+1} \leq \max\{0, \lambda_t + \mu(|\beta| - \delta \mu \lambda_t)\} \quad (51)$$

For the case when  $\lambda_t = 0$ , we have  $\lambda_{t+1} = \mu|\beta|$ . Since we assume that  $\delta \leq 1/\mu^2$ , we can easily verify that  $\lambda_{t+1} \leq \mu|\beta| \leq |\beta|/(\delta\mu)$ .

For the case when  $\lambda_t \geq 0$ , since we see that  $\lambda_t + \mu(|\beta| - \delta\mu\lambda_t) \geq 0$  from the induction hypothesis that  $\lambda_t \leq |\beta|/(\delta\mu)$ , we must have:

$$\lambda_{t+1} = \lambda_t + \mu(|\beta| - \delta\mu\lambda_t). \quad (52)$$

Subtract  $|\delta|/\mu\beta$  on both sides of the above inequality, we get:

$$\lambda_{t+1} - \frac{|\beta|}{\delta\mu} = (1 - \delta\mu^2)(\lambda_t - \frac{|\beta|}{\delta\mu}) \quad (53)$$

Since we have  $\lambda_t \leq |\beta|/(\delta\mu)$  and  $\delta \leq 1/\mu^2$ , it is easy to see that we have for  $\lambda_{t+1}$ :

$$\lambda_{t+1} - \frac{|\beta|}{\delta\mu} \leq 0. \quad (54)$$

Hence we prove the lemma.  $\square$

For notation simplicity, let us denote  $\frac{|\beta|}{\delta\mu}$  as  $\lambda_m$ .

We now show how to relate  $\sum_t \hat{y}[i] + \lambda_t \hat{z}[i] - \kappa \sum_{j=1}^K \frac{\pi_i(s_t)[j]}{p_t[j]}$  to  $\sum_t y_t[i] + \lambda_t z[i]$  for any  $i \in [|\Pi|]$ :

**Lemma D.3.** *In EXP4.P.R (Alg. 3), with probability at least  $1 - \delta$ , for any  $w \in \Delta\Pi$ , we have:*

$$\begin{aligned} & \sum_{t=1}^T \sum_{i=1}^{|\Pi|} w[i] (\hat{y}_t[i] + \lambda_t \hat{z}_t[i] - \kappa \sum_{j=1}^K \frac{\pi_i(s_t)[j]}{p_t[j]}) \\ & \leq \sum_{t=1}^T \sum_{i=1}^{|\Pi|} (w[i] (y_t[i] + \lambda_t z_t[i]) + (1 + \lambda_m) \frac{\ln(|\Pi|/\delta)}{\kappa}). \end{aligned}$$

We use similar proof strategy as shown in the proof of Lemma 3.1 in (Bubeck et al., 2012) with three additional steps: (1) union bound over all polices in  $\Pi$ , (2) introduction of a distribution  $w \in \Delta(\Pi)$ , (3) taking care of  $\lambda_t$  by using its upper bound from Lemma D.2.

*Proof.* Let us set  $\delta' = \delta/|\Pi|$  and fix  $i \in [|\Pi|]$ . Define  $\tilde{x}_t(\lambda_t) = \hat{y}_t + \lambda_t \hat{z}_t$  and we denote  $\hat{x}_t(\lambda_t)[i] = \tilde{x}_t(\lambda_t)[i] - \kappa \sum_{j=1}^K (\pi_i(s_t)[j]/p_t[j])$ .

For notation simplicity, we are going to use  $\tilde{x}_t$  and  $\hat{x}_t$  to represent  $\tilde{x}_t(\lambda_t)[i]/(1 + \lambda_m)$  and  $\hat{x}_t(\lambda_t)[i]/(1 + \lambda_m)$  respectively in the rest of the proof.

Let us also define  $x_t = (y_t[i] + \lambda_t z_t[i])/(1 + \lambda_m)$ . It is also straightforward to check that  $\kappa(\hat{x}_t - x_t) \leq 1$  since  $\hat{x}_t \leq 0$ ,  $-x_t \leq 1$  and  $0 < \kappa \leq 1$ . Note that it is straightforward to show that  $\mathbb{E}_t(\hat{x}_t) = x_t$ , where we denote  $\mathbb{E}_t$  as the expectation conditioned on randomness from  $a_1, \dots, a_{t-1}$ .

Following the same strategy in the proof of Lemma 3.1 in (Bubeck et al., 2012), we can show that:

$$\begin{aligned} \mathbb{E}_t [\exp(\kappa(\hat{x}_t - x_t))] &= \mathbb{E}_t [\exp(\kappa(\tilde{x}_t - \kappa \sum_{j=1}^K (\pi_i(s_t)[j]/p_t[j]) - x_t))] \\ &\leq (1 + \mathbb{E}_t \kappa(\tilde{x}_t - x_t) + \kappa^2 \mathbb{E}_t (\tilde{x}_t - x_t)^2) \exp(-\kappa^2 \sum_{j=1}^K \frac{\pi_i(s_t)[j]}{p_t[j]}) \\ &\leq (1 + \kappa^2 \mathbb{E}_t (\tilde{x}_t^2)) \exp(-\kappa^2 \sum_{j=1}^K \frac{\pi_i(s_t)[j]}{p_t[j]}) \end{aligned} \quad (55)$$



We can upper bound  $\mathbb{E}_t(\hat{x}_t^2)$  as follows:

$$\begin{aligned}
 \mathbb{E}_t(\hat{x}_t^2) &= \mathbb{E}_t \left[ \left( \left( \sum_{j=1}^K \pi_i(s_t)[j] \frac{c_t[j] \mathbb{1}(a_t = j)}{p_t[j]} + \lambda_t \sum_{j=1}^K \pi_i(s_t)[j] \frac{r_t[j] \mathbb{1}(a_t = j)}{p_t[j]} \right) / (1 + \lambda_m) \right)^2 \right] \\
 &\leq \mathbb{E}_{t, j \sim \pi_i(s_t)} \left( \left( \hat{c}[j] / p_t[j] + \lambda_t \hat{r}_t[j] / p_t[j] \right) / (1 + \lambda_m) \right)^2 \\
 &= \mathbb{E}_{j \sim \pi_i(s_t)} \left( (c_t[j] + \lambda_t r_t[j]) / (1 + \lambda_m) \right)^2 / p_t[j] \leq \mathbb{E}_{j \sim \pi_i(s_t)} (1 / p_t(j)) = \sum_{j=1}^K \frac{\pi_i(s_t)[j]}{p_t[j]}
 \end{aligned} \tag{56}$$

where the first inequality comes from Jensen's inequality and the last inequality comes from the fact that  $|c_t[j]| \leq 1$  and  $|\lambda_t r_t[j]| \leq \lambda_m$ . Substitute the above results in Eq. 55, we get:

$$\begin{aligned}
 \mathbb{E}_t \left[ \exp(\kappa(\hat{x}_t - x_t)) \right] &\leq (1 + \kappa^2 \sum_{j=1}^K \frac{\pi_i(s_t)[j]}{p_t[j]}) \exp(-\kappa^2 \sum_{j=1}^K \frac{\pi_i(s_t)[j]}{p_t[j]}) \\
 &\leq \exp(\kappa^2 \sum_{j=1}^K \frac{\pi_i(s_t)[j]}{p_t[j]}) \exp(-\kappa^2 \sum_{j=1}^K \frac{\pi_i(s_t)[j]}{p_t[j]}) \leq 1.
 \end{aligned} \tag{57}$$

Hence, we have:

$$\mathbb{E} \exp(\kappa \sum_{t=1}^T (\hat{x}_t - x_t)) \leq 1. \tag{58}$$

Now from Markov inequality we know  $P(X \geq \ln(\delta^{-1})) \leq \delta \mathbb{E}(e^X)$ . Hence, this gives us that with probability least  $1 - \delta$ :

$$\kappa \sum_t (\hat{x}_t - x_t) \leq \ln(1/\delta). \tag{59}$$

Substitute the representation of  $\hat{x}_t, x_t$  in, we get for  $i$ , with probability  $1 - \delta'$ :

$$\sum_{t=1}^T \hat{y}_t[i] + \lambda_t \hat{z}_t[i] - \kappa \sum_{j=1}^K (\pi_i(s_t)[j] / p_t[j]) \leq \sum_{t=1}^T y_t[i] + \lambda_t z_t[i] + (1 + \lambda_m) \frac{\ln(1/\delta')}{\kappa}.$$

Now apply union bound over all policies in  $\Pi$ , it is straightforward to show that for any  $i \in |\Pi|$ , with probability at least  $1 - \delta$ , we have:

$$\sum_{t=1}^T \hat{y}_t[i] + \lambda_t \hat{z}_t[i] - \kappa \sum_{j=1}^K (\pi_i(s_t)[j] / p_t[j]) \leq \sum_{t=1}^T y_t[i] + \lambda_t z_t[i] + (1 + \lambda_m) \frac{\ln(|\Pi|/\delta)}{\kappa}.$$

To prove the lemma, now let us fix any  $w \in \Delta(|\Pi|)$ , we can simply multiple  $w[i]$  on the both sides of the above inequality, and then sum over from  $i = 1$  to  $|\Pi|$ .  $\square$

Let us define  $\hat{w} \in \Delta(\Pi)$  as:

$$\hat{w} = \arg \min_{w \in \Delta(\Pi)} \sum_{t=1}^T \sum_{i=1}^{|\Pi|} w[i] (\hat{y}_t[i] + \lambda_t \hat{z}_t[i] - \kappa \sum_{j=1}^K \frac{\pi_i(s_t)[j]}{p_t[j]}), \tag{60}$$

and  $\hat{w}^* \in \Delta(\Pi)$  as:

$$\hat{w}^* = \arg \min_{w \in \Delta(\Pi)} \sum_{t=1}^T \sum_{i=1}^{|\Pi|} w[i] (y_t[i] + \lambda_t z_t[i]) \tag{61}$$

Now we turn to prove Theorem 4.3.

*Proof of Theorem 4.3.* We prove the asymptotic property of Alg. 3 when  $T$  approaches to infinity. Since we set  $\mu = \sqrt{\frac{\ln(|\Pi|)}{(3K+4)T}}$  and  $\delta = T^{-\epsilon+1/2}K$ , we can first verify the condition  $\delta \leq 1/\mu^2$  in Lemma D.2. This condition holds since  $\delta = O(T^{0.5})$  while  $1/\mu^2 = \Theta(T)$ .

Let us first compute some facts. For  $w_t^T \hat{x}_t$ , we have:

$$\begin{aligned} w_t^T \hat{x}_t(\lambda_t) &= \mathbb{E}_{j \sim w_t}(\hat{y}_t[j] + \lambda_t \hat{z}_t[j] - \kappa \sum_{i=1}^K \frac{\pi_j(s_t)[i]}{p_t[i]}) = \mathbb{E}_{j \sim p_t} \hat{c}_t[j] + \lambda_t \mathbb{E}_{j \sim p_t} \hat{r}_t[j] - \kappa \mathbb{E}_{j \sim p_t} \frac{1}{p_t[j]} \\ &= c_t[a_t] + \lambda_t r_t[a_t] - \kappa K. \end{aligned} \quad (62)$$

For  $\sum_{i=1}^{|\Pi|} w_t[i](\hat{x}_t(\lambda_t)[i])^2$ , we have:

$$\begin{aligned} \sum_{i=1}^{|\Pi|} w_t[i](\hat{x}_t(\lambda_t)[i])^2 &= \mathbb{E}_{i \sim w_t}(\hat{x}_t(\lambda_t)[i])^2 = \mathbb{E}_{i \sim w_t}(\hat{y}_t[i] + \lambda_t \hat{z}_t[i] - \kappa \sum_{j=1}^K \frac{\pi_i(s_t)[j]}{p_t[j]})^2 \\ &\leq \mathbb{E}_{i \sim w_t, j \sim \pi_i(s_t)}(\hat{c}_t[j] + \lambda_t \hat{r}_t[j] - \kappa/p_t[j])^2 = \mathbb{E}_{j \sim p_t}(\hat{c}_t[j] + \lambda_t \hat{r}_t[j] - \kappa/p_t[j])^2 \\ &= \sum_{i=1}^K p_t[i] \frac{(c_t[i] \mathbb{1}(a_t = i) + \lambda_t r_t[i] \mathbb{1}(a_t = i) - \kappa)^2}{p_t[i]^2} \\ &= \sum_{i=1}^K \frac{(c_t[i] \mathbb{1}(a_t = i) + \lambda_t r_t[i] \mathbb{1}(a_t = i) - \kappa)^2}{p_t[i]} \\ &\leq \sum_{i=1}^K (-1 - \lambda_t - \kappa)(\hat{c}_t[i] + \lambda_t \hat{r}_t[i] - \kappa/p_t[i]) \\ &= K(-1 - \lambda_t - \kappa) \sum_{i=1}^K ((1/K)\hat{c}_t[i] + \lambda_t(1/K)\hat{r}_t[i] - \kappa \frac{1/K}{p_t[i]}) \\ &\leq K(-1 - \lambda_t - \kappa) \left( \sum_{i=1}^{|\Pi|} \hat{w}[i](\hat{y}_t[i] + \lambda_t \hat{z}_t[i] - \kappa \sum_{j=1}^K \frac{\pi_i(s_t)[j]}{p_t[j]}) \right), \end{aligned} \quad (63)$$

where the first inequality comes from Jensen's inequality and the last inequality uses the assumption that the  $\Pi$  contains the uniform policy (i.e., the policy that assign probability  $1/K$  to each action). Consider the RHS of Eq. 49, we have:

$$\begin{aligned} &\frac{\lambda^2}{\mu} + \frac{\ln(|\Pi|)}{\mu} + \frac{\mu}{2} \sum_{t=1}^T \sum_{i=1}^{|\Pi|} w_t[i](\hat{x}_t(\lambda_t)[i])^2 + \frac{\mu}{2} \sum_{t=1}^T (w_t^T \hat{z}_t - \beta - \delta \mu \lambda_t)^2 \\ &\leq \frac{\lambda^2}{\mu} + \frac{\ln(|\Pi|)}{\mu} + \frac{\mu}{2} \sum_{t=1}^T K(-1 - \lambda_t - \kappa) \left( \sum_{i=1}^{|\Pi|} \hat{w}[i](\hat{y}_t[i] + \lambda_t \hat{z}_t[i] - \kappa \sum_{j=1}^K \frac{\pi_i(s_t)[j]}{p_t[j]}) \right) + \mu \sum_{t=1}^T ((w_t^T \hat{z}_t - \beta)^2 + \delta^2 \mu^2 \lambda_t^2) \\ &= \frac{\lambda^2}{\mu} + \frac{\ln(|\Pi|)}{\mu} + \frac{\mu}{2} \sum_{t=1}^T K(-1 - \lambda_t - \kappa) \left( \sum_{i=1}^{|\Pi|} \hat{w}[i](\hat{y}_t[i] + \lambda_t \hat{z}_t[i] - \kappa \sum_{j=1}^K \frac{\pi_i(s_t)[j]}{p_t[j]}) \right) + \mu \sum_{t=1}^T ((r_t[a_t] - \beta)^2 + \delta^2 \mu^2 \lambda_t^2) \end{aligned} \quad (64)$$

Consider the LHS of Eq. 49, set  $w = \hat{w}$ , we have:

$$\begin{aligned} &\sum_{t=1}^T [\mathcal{L}_t(w_t, \lambda) - \mathcal{L}_t(\hat{w}, \lambda_t)] \\ &= \sum_{t=1}^T \left[ c_t[a_t] + \lambda r_t[a_t] - \kappa K - \lambda \beta - \delta \mu \lambda^2 / 2 - \left( \sum_{i=1}^{|\Pi|} \hat{w}[i](\hat{y}_t[i] + \lambda_t \hat{z}_t[i] - \kappa \sum_{j=1}^K \frac{\pi_i(s_t)[j]}{p_t[j]}) \right) + \lambda_t \beta + \delta \mu \lambda_t^2 / 2 \right]. \end{aligned} \quad (65)$$

Chaining Eq. 64 and Eq. 65 together and rearrange terms, we will get:

$$\begin{aligned}
 & \sum_{t=1}^T \left[ c_t[a_t] + \lambda(r_t[a_t] - \beta) + \lambda_t \beta + \delta \mu \lambda_t^2 / 2 \right] - T \delta \mu \lambda^2 / 2 \\
 & \leq T \kappa K + \frac{\lambda^2 + \ln(|\Pi|)}{\mu} + \sum_{t=1}^T \left( 1 - \frac{\mu K}{2} (1 + \lambda_t + \kappa) \right) \left( \sum_{i=1}^{|\Pi|} \hat{w}[i] (\hat{y}_t[i] + \lambda_t \hat{z}_t[i] - \kappa \sum_{j=1}^K \frac{\pi_i(s_t)[j]}{p_t[j]}) \right) \\
 & \quad + \mu \sum_{t=1}^T (2 + 2\beta^2 + \delta^2 \mu^2 \lambda_t^2). \tag{66}
 \end{aligned}$$

Since we have  $\delta \geq \frac{|\beta|}{2/K - \mu - \kappa \mu}$ , we can show that  $1 - \frac{\mu K}{2} (1 + \lambda_t + \kappa) \geq 0$ .

Now back to Eq. 66, using Lemma. D.3, we have with probability  $1 - \nu$ :

$$\begin{aligned}
 & \sum_{t=1}^T \left[ c_t[a_t] + \lambda(r_t[a_t] - \beta) + \lambda_t \beta + \delta \mu \lambda_t^2 / 2 \right] - T \delta \mu \lambda^2 / 2 \\
 & \leq T \kappa K + \frac{\lambda^2 + \ln(|\Pi|)}{\mu} + \sum_{t=1}^T \left( 1 - \frac{\mu K}{2} (1 + \lambda_t + \kappa) \right) \left( \sum_{i=1}^{|\Pi|} \hat{w}^*[i] (y_t[i] + \lambda_t z_t[i]) \right) \\
 & \quad + (1 + \lambda_m) \frac{\ln(|\Pi|/\nu)}{\kappa} + (2 + 2\beta^2) T \mu + \mu^3 \delta^2 \sum_t \lambda_t^2 \\
 & \leq T \kappa K + \frac{\lambda^2 + \ln(|\Pi|)}{\mu} + \sum_{t=1}^T \left( 1 - \frac{\mu K}{2} (1 + \lambda_t + \kappa) \right) \left( \sum_{i=1}^{|\Pi|} w^*[i] (y_t[i] + \lambda_t z_t[i]) \right) \\
 & \quad + (1 + \lambda_m) \frac{\ln(|\Pi|/\nu)}{\kappa} + (2 + 2\beta^2) T \mu + \mu^3 \delta^2 \sum_t \lambda_t^2. \tag{67}
 \end{aligned}$$

where the last inequality follows from the definition of  $\hat{w}^*$  and  $w^*$ . Rearrange terms, we get:

$$\begin{aligned}
 & \sum_{t=1}^T \left[ (c_t[a_t] - w^{*T} y_t) + \lambda(r_t[a_t] - \beta) - \lambda_t (w^{*T} z_t - \beta) \right] - T \delta \mu \lambda^2 / 2 + \sum_{t=1}^T \delta \mu \lambda_t^2 / 2 \\
 & \leq T \kappa K + \frac{\lambda^2 + \ln(|\Pi|)}{\mu} + \sum_{t=1}^T \frac{\mu K}{2} (1 + \lambda_t + \kappa) (1 + \lambda_t) + (1 + \lambda_m) \frac{\ln(|\Pi|/\nu)}{\kappa} + (2 + 2\beta^2) T \mu + \mu^3 \delta^2 \sum_t \lambda_t^2 \\
 & \leq T \kappa K + \frac{\lambda^2 + \ln(|\Pi|)}{\mu} + \sum_{t=1}^T \frac{\mu K}{2} (1 + (2 + \kappa) \lambda_t + \kappa) + (1 + \lambda_m) \frac{\ln(|\Pi|/\nu)}{\kappa} + (2 + 2\beta^2) T \mu + \left( \frac{K \mu}{2} + \mu^3 \delta^2 \right) \sum_t \lambda_t^2 \\
 & = T \kappa K + \frac{\lambda^2 + \ln(|\Pi|)}{\mu} + \sum_{t=1}^T \frac{\mu K}{2} (1 + (2 + \kappa) \lambda_t + \kappa) + (1 + \frac{|\beta|}{\delta \mu}) \frac{\ln(|\Pi|/\nu)}{\kappa} + (2 + 2\beta^2) T \mu + \left( \frac{K \mu}{2} + \mu^3 \delta^2 \right) \sum_t \lambda_t^2. \tag{68}
 \end{aligned}$$

Note that under the setting of  $\delta$  and  $\mu$  we have  $\frac{\delta \mu}{2} \geq \frac{K \mu}{2} + \mu^3 \delta^2$  (we will verify it at the end of the proof), we can drop the terms that relates to  $\lambda_t^2$  in the above inequality. Note that we have  $\delta \mu = T^{-\epsilon} \sqrt{K \ln(|\Pi|)} \geq T^{-\epsilon}$ , where  $\epsilon \in (0, 1/2)$ . Substitute  $\delta \mu \geq T^{-\epsilon}$  into the above inequality and rearrange terms, we get:

$$\begin{aligned}
 & \sum_{t=1}^T c_t[a_t] - w^{*T} y_t + \lambda(r_t[a_t] - \beta) - \lambda_t (w^{*T} z_t - \beta) - T \delta \mu \lambda^2 / 2 \\
 & = \frac{\lambda^2 + \ln(|\Pi|)}{\mu} + T \kappa K + (K + 2 + 2\beta^2 + 2K|\beta|) T \mu + (1 + |\beta| T^\epsilon) \frac{\ln(|\Pi|/\nu)}{\kappa} \tag{69}
 \end{aligned}$$

Now let us set  $\lambda = 0$  and since we have that  $\sum_{t=1}^T \lambda_t (w^{*T} z_t - \beta) \leq 0$ , we get:

$$\begin{aligned} \sum_{t=1}^T c_t[a_t] - w^{*T} y_t &\leq \frac{\ln(|\Pi|)}{\mu} + T\kappa K + (K + 2 + 2\beta^2 + 2K|\beta|)T\mu + (1 + |\beta|T^\epsilon) \frac{\ln(|\Pi|/\nu)}{\kappa} \\ &\leq \frac{\ln(|\Pi|)}{\mu} + T\kappa K + (3K + 4)T\mu + (1 + T^\epsilon) \frac{\ln(|\Pi|/\nu)}{\kappa} \\ &\leq 2\sqrt{T(\ln(|\Pi|)(3K + 4))} + 2\sqrt{TK(1 + T^\epsilon) \ln(|\Pi|/\nu)} = O(\sqrt{T^{1+\epsilon} K \ln(|\Pi|/\nu)}) \end{aligned} \quad (70)$$

where we set  $\mu$  and  $\kappa$  as:

$$\mu = \sqrt{\frac{\ln(|\Pi|)}{(3K + 4)T}}, \quad \kappa = \sqrt{\frac{(1 + T^\epsilon) \ln(|\Pi|/\nu)}{TK}}. \quad (71)$$

Now let us consider  $\sum_t (r_t[a_t] - \beta)$ . Let us assume  $\sum_t (r_t[a_t] - \beta) \geq 0$ , otherwise we prove the theorem already. Note that  $\sum_{t=1}^T c_t[a_t] - w^{*T} y_t \geq -2T$ . Hence we have:

$$\begin{aligned} \lambda \sum_{t=1}^T (r_t[a_t] - \beta) - \lambda^2 (\delta\mu T/2 + 1/\mu) \\ \leq 2T + 2\sqrt{T(\ln(|\Pi|)(3K + 4))} + 2\sqrt{TK(1 + T^\epsilon) \ln(|\Pi|/\nu)}. \end{aligned}$$

To maximize the LHS of the above inequality, we set  $\lambda = \frac{\sum_{t=1}^T (r_t[a_t] - \beta)}{\delta\mu T/2 + 1/\mu}$ . Substitute  $\lambda$  into the above inequality, we get:

$$\begin{aligned} \left( \sum_{t=1}^T (r_t[a_t] - \beta) \right)^2 &\leq (2\delta\mu T + \frac{4}{\mu}) (2T + 2\sqrt{T(\ln(|\Pi|)(3K + 4))} + 2\sqrt{TK(1 + T^\epsilon) \ln(|\Pi|/\nu)}) \\ &\leq (2T^{1-\epsilon} \sqrt{\ln(|\Pi|)K} + \frac{4}{\mu}) (2T + 2\sqrt{T(\ln(|\Pi|)(3K + 4))} + 2\sqrt{TK(1 + T^\epsilon) \ln(|\Pi|/\nu)}) \\ &= 24(T^{2-\epsilon} \sqrt{K \ln(|\Pi|)} + T^{1.5-\epsilon} K \ln(|\Pi|) + T^{1.5-0.5\epsilon} K \ln(|\Pi|) + T^{1.5} \sqrt{K} + TK + T^{1+\epsilon} K \sqrt{\ln(1/\delta)}) \\ &= O(T^{2-\epsilon} K \ln(|\Pi|)). \end{aligned} \quad (72)$$

Hence we have:

$$\sum_{t=1}^T (r_t[a_t] - \beta) = O(T^{1-\epsilon/2} \sqrt{K \ln(|\Pi|)}). \quad (73)$$

Note that for  $\delta$ , we have  $\delta = KT^{-\epsilon+0.5}$ . To verify that  $\delta \geq \frac{|\beta|}{2/K - \mu - \kappa\mu}$ , we can see that as long as  $\epsilon \in (0, 1/2)$ , we have  $\delta = \Theta(T^{0.5-\epsilon})$  while  $|\beta|/(2/K - \mu - \kappa\mu) = O(1)$ . Hence when  $T$  is big enough, we can see that it always holds that  $\delta \geq \frac{|\beta|}{2/K - \mu - \kappa\mu}$ . For the second condition that  $\delta \geq K + 2\mu^2\delta^2 = K + 2\ln(|\Pi|)KT^{-2\epsilon}$ . Note that again as long as  $\epsilon \in (0, 1/2)$ , we have  $\delta = \Theta(T^{0.5-\epsilon})$ , and  $K + 2\ln(|\Pi|)KT^{-2\epsilon} = O(1)$ . Hence we have  $\delta \geq K + 2\ln(|\Pi|)KT^{-2\epsilon}$ . Hence, we have shown that when  $\mu = \sqrt{\frac{\ln(|\Pi|)}{(3K+4)T}}$ ,  $\kappa = \sqrt{\frac{(1+T^\epsilon)\ln(|\Pi|/\nu)}{TK}}$ , and  $\delta = T^{-\epsilon+1/2}K$ , we have that as  $T \rightarrow \infty$ :

$$\begin{aligned} \sum_{t=1}^T (c_t[a_t] - w^{*T} y_t) &= O(\sqrt{T^{1+\epsilon} \ln(|\Pi|/\nu)}), \\ \sum_{t=1}^T (r_t[a_t] - \beta) &\leq O(T^{1-\epsilon/2} \sqrt{K \ln(|\Pi|)}). \end{aligned} \quad (74)$$

□
